# Supplementary material for: Role of gender in perspectives of discrimination, stigma, and attitudes relative to cervical cancer in rural Sénégal
Source: PubMed Central journal article supplement (PMC7188246; doi:10.1371/journal.pone.0232291), 2020-04-28
Supplement: pone.0232291.s002.pdf [file pone.0232291.s002.pdf]

2019.11.21\_\_18Q04\_\_K01

JAD

8/31/2019

```
#PREPARE Prepare RStudio and the data
```

```
##Load Libraries
```

```
### Load the libraries needed for this session.
```

```
library(tidyverse)
```

```
## Warning: package 'tidyverse' was built under R version 3.6.1
```

```
## -- Attaching packages ----- tidyverse 1.2.1 --
```

```
## v ggplot2 3.2.1    v purrr  0.3.2
```

```
## v tibble  2.1.3    v dplyr  0.8.3
```

```
## v tidyr   1.0.0    v stringr 1.4.0
```

```
## v readr   1.3.1    v forcats 0.4.0
```

```
## Warning: package 'ggplot2' was built under R version 3.6.1
```

```
## Warning: package 'tibble' was built under R version 3.6.1
```

```
## Warning: package 'tidyr' was built under R version 3.6.1
```

```
## Warning: package 'dplyr' was built under R version 3.6.1
```

```
## -- Conflicts ----- tidyverse_conflicts() --
```

```
## x dplyr::filter() masks stats::filter()
```

```
## x dplyr::lag()    masks stats::lag()
```

```
library(here)
```

```
## here() starts at C:/Users/aldio/Google Drive/AD Scholarship _ Research/DATA ANALYSIS/18Q04 K01/18Q04 K01
```

```
library(dplyr)
library(readr)
library(naniar) #Replace with NA
```

```
## Warning: package 'naniar' was built under R version 3.6.1
```

```
library(arsenal)
```

```
## Warning: package 'arsenal' was built under R version 3.6.1
```

```
library(coin)
```

```
## Warning: package 'coin' was built under R version 3.6.1
```

```
## Loading required package: survival
```

```
## Warning: package 'survival' was built under R version 3.6.1
```

```
library(knitr)
opts_chunk$set(tidy.opts = list(width.cutoff = 60), tidy = TRUE)
```

```
##Load the Data
```

```
###
Q1804dta <- read_csv(here("Data", "18Q04 K01 1234Data Comb.csv"))
```

```
## Parsed with column specification:
## cols(
##   .default = col_double(),
##   ADz_SurvNum = col_character(),
```

```

## ADz_IntvrName = col_character(),
## ADz_SurvDate = col_character(),
## ADz_SurvTmStrt = col_character(),
## ADz_SurvTmEnd = col_character(),
## ADz_PartcName = col_logical(),
## ADz_PartcNum = col_character(),
## SDz_AgeCat = col_logical(),
## SDz_Ethnicity = col_logical(),
## SDz_EthnicityOthr = col_logical(),
## SDz_EthnicityAll = col_logical(),
## SDz_LangPref = col_character(),
## SDz_LangPrefAll = col_logical(),
## BAF_CarePay = col_character(),
## BAF_CarePayOthr = col_character(),
## BAF_CarePayAll = col_logical(),
## BAF_CareCost = col_character(),
## HSz_DecTrust = col_character(),
## HSz_Dist = col_character(),
## HSz_ProvTyp = col_character()
## # ... with 19 more columns
## )

```

## See spec(...) for full column specifications.

#DATA CLEANING

##Omit all N/A

```

Q1804dta <- Q1804dta %>%
  replace_with_na_all(condition = ~.x == 99) %>% #Must load library (naniar)
  replace_with_na_all(condition = ~.x == 88)

#na.omit(Q1804dta)

```

##Combine columns of categorical data to make multi-select questions complete

Combine SDLangPref and SDLangPrefOthr into new variable SDLangPrefAll and tally. Create a new variable with the combined categorical data from two columns that are each multichoice Use the function to tally the categorical data Call the function with the new variable. <https://stackoverflow.com/questions/49913014/r-mutate-working-with-paste0> <https://stackoverflow.com/questions/45696738/tallying-multiple-choice-entries-in-a-single-column-in-a-r-dataframe-programmati>

Combine 2 Columns of Categorical Data. This incorporates the qualitative responses that were quantified into the existing quantified response list.

```
# SDz_LangPrefAll MUTATE COMBINE Populates SDz_LangPrefAll
# with combined Categorical Data of SDz_LangPref &
# SDz_LangPrefOthr
Q1804dta <- Q1804dta %>% mutate(SDz_LangPrefAll = paste(SDz_LangPref,
  SDz_LangPrefOthr)) %>% select(-c(SDz_LangPref, SDz_LangPrefOthr))

# Populates BAF_CarePayAll with combined Categorical Data of
# BAF_CarePay & BAF_CarePayOthr
Q1804dta <- Q1804dta %>% mutate(BAF_CarePayAll = paste(BAF_CarePay,
  BAF_CarePayOthr)) %>% select(-c(BAF_CarePay, BAF_CarePayOthr))

# Populates HSz_ProvTypAll with combined Categorical Data of
# HSz_ProvTyp & HSz_ProvTypOthr
Q1804dta <- Q1804dta %>% mutate(HSz_ProvTypAll = paste(HSz_ProvTyp,
  HSz_ProvTypOthr)) %>% select(-c(HSz_ProvTyp, HSz_ProvTypOthr))

# Populates HSz_ServLangAll with combined Categorical Data of
# HSz_ServLang & HSz_ServLangOthr
Q1804dta <- Q1804dta %>% mutate(HSz_ServLangAll = paste(HSz_ServLang,
  HSz_ServLangOthr)) %>% select(-c(HSz_ServLang, HSz_ServLangOthr))

# Populates HSz_LangInterpAll with combined Categorical Data
# of HSz_LangInterp & HSz_LangInterpOthr
Q1804dta <- Q1804dta %>% mutate(HSz_LangInterpAll = paste(HSz_LangInterp,
  HSz_LangInterpOthr)) %>% select(-c(HSz_LangInterp, HSz_LangInterpOthr))

# Populates DSz_BsisAll with combined Categorical Data of
# DSz_Bsis & DSz_BsisOthr
Q1804dta <- Q1804dta %>% mutate(DSz_BsisAll = paste(DSz_Bsis,
  DSz_BsisOthr)) %>% select(-c(DSz_Bsis, DSz_BsisOthr))

# Populates EXz_ScrnWhyAll with combined Categorical Data of
# EXz_ScrnWhy & EXz_ScrnWhyOthr
Q1804dta <- Q1804dta %>% mutate(EXz_ScrnWhyAll = paste(EXz_ScrnWhy,
  EXz_ScrnWhyOthr)) %>% select(-c(EXz_ScrnWhy, EXz_ScrnWhyOthr))

# Populates GNz_WHCDecisAll with combined Categorical Data of
```

```
# GNz_WHCDecis & GNz_WHCDecisOthr
Q1804dta <- Q1804dta %>% mutate(GNz_WHCDecisAll = paste(GNz_WHCDecis,
  GNz_WHCDecisOthr)) %>% select(-c(GNz_WHCDecis, GNz_WHCDecisOthr))
```

##Create a new table for each multi-select variable. Use separate\_rows to pull out each response Use pivot\_wider to expand the table so that each variable has its own column. These will be combined with the master dataset subsequently.

```
LangPref <- Q1804dta %>% select(ADz_PartNum, SDz_LangPrefAll) %>%
  separate_rows(SDz_LangPrefAll) %>% mutate(LangPref_Checked = TRUE) %>%
  mutate(SDz_LangPrefAll = case_when(SDz_LangPrefAll == 1 ~
    "SDz_LangPrefAll_01", SDz_LangPrefAll == 2 ~ "SDz_LangPrefAll_02",
    SDz_LangPrefAll == 3 ~ "SDz_LangPrefAll_03", SDz_LangPrefAll ==
    4 ~ "SDz_LangPrefAll_04", SDz_LangPrefAll == 5 ~
    "SDz_LangPrefAll_05", SDz_LangPrefAll == 6 ~ "SDz_LangPrefAll_06",
    SDz_LangPrefAll == 7 ~ "SDz_LangPrefAll_07", SDz_LangPrefAll ==
    8 ~ "SDz_LangPrefAll_08", SDz_LangPrefAll == 9 ~
    "SDz_LangPrefAll_09", SDz_LangPrefAll == 10 ~ "SDz_LangPrefAll_10",
    SDz_LangPrefAll == 11 ~ "SDz_LangPrefAll_11", SDz_LangPrefAll ==
    12 ~ "SDz_LangPrefAll_12", SDz_LangPrefAll == 13 ~
    "SDz_LangPrefAll_13", SDz_LangPrefAll == 14 ~ "SDz_LangPrefAll_14",
    SDz_LangPrefAll == 15 ~ "SDz_LangPrefAll_15", SDz_LangPrefAll ==
    16 ~ "SDz_LangPrefAll_16", SDz_LangPrefAll == 17 ~
    "SDz_LangPrefAll_17", SDz_LangPrefAll == 18 ~ "SDz_LangPrefAll_18",
    SDz_LangPrefAll == 19 ~ "SDz_LangPrefAll_19", SDz_LangPrefAll ==
    20 ~ "SDz_LangPrefAll_20")) %>% pivot_wider(id_cols = ADz_PartNum,
  names_from = SDz_LangPrefAll, values_from = LangPref_Checked,
  values_fill = list(LangPref_Checked = FALSE)) %>% select(-c("NA"))
```

```
ServLang <- Q1804dta %>% select(ADz_PartNum, HSz_ServLangAll) %>%
  separate_rows(HSz_ServLangAll) %>% mutate(ServLang_Checked = TRUE) %>%
  mutate(HSz_ServLangAll = case_when(HSz_ServLangAll == 1 ~
    "HSz_ServLangAll_01", HSz_ServLangAll == 2 ~ "HSz_ServLangAll_02",
    HSz_ServLangAll == 3 ~ "HSz_ServLangAll_03", HSz_ServLangAll ==
    4 ~ "HSz_ServLangAll_04", HSz_ServLangAll == 5 ~
    "HSz_ServLangAll_05", HSz_ServLangAll == 6 ~ "HSz_ServLangAll_06",
    HSz_ServLangAll == 7 ~ "HSz_ServLangAll_07", HSz_ServLangAll ==
    8 ~ "HSz_ServLangAll_08", HSz_ServLangAll == 9 ~
    "HSz_ServLangAll_09", HSz_ServLangAll == 10 ~ "HSz_ServLangAll_10",
```

```

HSz_ServLangAll == 11 ~ "HSz_ServLangAll_11", Hsz_ServLangAll ==
  12 ~ "HSz_ServLangAll_12", Hsz_ServLangAll == 13 ~
  "HSz_ServLangAll_13", Hsz_ServLangAll == 14 ~ "HSz_ServLangAll_14",
HSz_ServLangAll == 15 ~ "HSz_ServLangAll_15", Hsz_ServLangAll ==
  16 ~ "HSz_ServLangAll_16", Hsz_ServLangAll == 17 ~
  "HSz_ServLangAll_17", Hsz_ServLangAll == 18 ~ "HSz_ServLangAll_18",
HSz_ServLangAll == 19 ~ "HSz_ServLangAll_19", Hsz_ServLangAll ==
  20 ~ "HSz_ServLangAll_20", Hsz_ServLangAll == 88 ~
  "88")) %>% na.omit() %>% pivot_wider(id_cols = ADz_PartNum,
names_from = Hsz_ServLangAll, values_from = ServLang_Checked,
values_fill = list(ServLang_Checked = FALSE)) %>% select(-c("88"))

```

```

LangInterp <- Q1804dta %>% select(ADz_PartNum, Hsz_LangInterpAll) %>%
  separate_rows(Hsz_LangInterpAll) %>% mutate(LangInterp_Checked = TRUE) %>%
  mutate(Hsz_LangInterpAll = case_when(Hsz_LangInterpAll ==
    1 ~ "HSz_LangInterpAll_01", Hsz_LangInterpAll == 2 ~
    "HSz_LangInterpAll_02", Hsz_LangInterpAll == 3 ~ "HSz_LangInterpAll_03",
    Hsz_LangInterpAll == 4 ~ "HSz_LangInterpAll_04", Hsz_LangInterpAll ==
    5 ~ "HSz_LangInterpAll_05", Hsz_LangInterpAll ==
    6 ~ "HSz_LangInterpAll_06", Hsz_LangInterpAll ==
    7 ~ "HSz_LangInterpAll_07", Hsz_LangInterpAll ==
    8 ~ "HSz_LangInterpAll_08", Hsz_LangInterpAll ==
    9 ~ "HSz_LangInterpAll_09", Hsz_LangInterpAll ==
    10 ~ "HSz_LangInterpAll_10", Hsz_LangInterpAll ==
    11 ~ "HSz_LangInterpAll_11", Hsz_LangInterpAll ==
    12 ~ "HSz_LangInterpAll_12", Hsz_LangInterpAll ==
    13 ~ "HSz_LangInterpAll_13", Hsz_LangInterpAll ==
    14 ~ "HSz_LangInterpAll_14", Hsz_LangInterpAll ==
    15 ~ "HSz_LangInterpAll_15", Hsz_LangInterpAll ==
    16 ~ "HSz_LangInterpAll_16", Hsz_LangInterpAll ==
    17 ~ "HSz_LangInterpAll_17", Hsz_LangInterpAll ==
    18 ~ "HSz_LangInterpAll_18", Hsz_LangInterpAll ==
    19 ~ "HSz_LangInterpAll_19", Hsz_LangInterpAll ==
    20 ~ "HSz_LangInterpAll_20", Hsz_LangInterpAll ==
    88 ~ "88", Hsz_LangInterpAll == 99 ~ "99")) %>% na.omit() %>%
  pivot_wider(id_cols = ADz_PartNum, names_from = Hsz_LangInterpAll,
    values_from = LangInterp_Checked, values_fill = list(LangInterp_Checked = FALSE)) %>%
  select(-c("88"))

```

```

CarePay <- Q1804dta %>% select(ADz_PartNum, BAF_CarePayAll) %>%
  separate_rows(BAF_CarePayAll) %>% mutate(CarePay_Checked = TRUE) %>%
  mutate(BAF_CarePayAll = case_when(BAF_CarePayAll == 1 ~ "BAF_CarePayAll_01",
    BAF_CarePayAll == 2 ~ "BAF_CarePayAll_02", BAF_CarePayAll ==
      3 ~ "BAF_CarePayAll_03", BAF_CarePayAll == 4 ~ "BAF_CarePayAll_04",
    BAF_CarePayAll == 5 ~ "BAF_CarePayAll_05", BAF_CarePayAll ==
      6 ~ "BAF_CarePayAll_06", BAF_CarePayAll == 7 ~ "BAF_CarePayAll_07",
    BAF_CarePayAll == 8 ~ "BAF_CarePayAll_08", BAF_CarePayAll ==
      9 ~ "BAF_CarePayAll_09", BAF_CarePayAll == 10 ~ "BAF_CarePayAll_10",
    BAF_CarePayAll == 11 ~ "BAF_CarePayAll_11", BAF_CarePayAll ==
      12 ~ "BAF_CarePayAll_12", BAF_CarePayAll == 13 ~
      "BAF_CarePayAll_13", BAF_CarePayAll == 14 ~ "BAF_CarePayAll_14",
    BAF_CarePayAll == 15 ~ "BAF_CarePayAll_15", BAF_CarePayAll ==
      16 ~ "BAF_CarePayAll_16", BAF_CarePayAll == 17 ~
      "BAF_CarePayAll_17", BAF_CarePayAll == 18 ~ "BAF_CarePayAll_18",
    BAF_CarePayAll == 19 ~ "BAF_CarePayAll_19", BAF_CarePayAll ==
      20 ~ "BAF_CarePayAll_20", BAF_CarePayAll == 88 ~
      "88")) %>% na.omit() %>% pivot_wider(id_cols = ADz_PartNum,
names_from = BAF_CarePayAll, values_from = CarePay_Checked,
values_fill = list(CarePay_Checked = FALSE)) %>% select(-c("88"))

```

```

ProvTyp <- Q1804dta %>% select(ADz_PartNum, HSz_ProvTypAll) %>%
  separate_rows(HSz_ProvTypAll) %>% mutate(ProvTyp_Checked = TRUE) %>%
  mutate(HSz_ProvTypAll = case_when(HSz_ProvTypAll == 1 ~ "HSz_ProvTypAll_01",
    HSz_ProvTypAll == 2 ~ "HSz_ProvTypAll_02", HSz_ProvTypAll ==
      3 ~ "HSz_ProvTypAll_03", HSz_ProvTypAll == 4 ~ "HSz_ProvTypAll_04",
    HSz_ProvTypAll == 5 ~ "HSz_ProvTypAll_05", HSz_ProvTypAll ==
      6 ~ "HSz_ProvTypAll_06", HSz_ProvTypAll == 7 ~ "HSz_ProvTypAll_07",
    HSz_ProvTypAll == 8 ~ "HSz_ProvTypAll_08", HSz_ProvTypAll ==
      9 ~ "HSz_ProvTypAll_09", HSz_ProvTypAll == 10 ~ "HSz_ProvTypAll_10",
    HSz_ProvTypAll == 11 ~ "HSz_ProvTypAll_11", HSz_ProvTypAll ==
      12 ~ "HSz_ProvTypAll_12", HSz_ProvTypAll == 13 ~
      "HSz_ProvTypAll_13", HSz_ProvTypAll == 14 ~ "HSz_ProvTypAll_14",
    HSz_ProvTypAll == 15 ~ "HSz_ProvTypAll_15", HSz_ProvTypAll ==
      16 ~ "HSz_ProvTypAll_16", HSz_ProvTypAll == 17 ~
      "HSz_ProvTypAll_17", HSz_ProvTypAll == 18 ~ "HSz_ProvTypAll_18",
    HSz_ProvTypAll == 19 ~ "HSz_ProvTypAll_19", HSz_ProvTypAll ==
      20 ~ "HSz_ProvTypAll_20")) %>% na.omit() %>% pivot_wider(id_cols = ADz_PartNum,

```

```
names_from = HSz_ProvTypAll, values_from = ProvTyp_Checked,  
values_fill = list(ProvTyp_Checked = FALSE))
```

```
Bsis <- Q1804dta %>% select(ADz_PartNum, DSz_BsisAll) %>% separate_rows(DSz_BsisAll) %>%  
mutate(Bsis_Checked = TRUE) %>% mutate(DSz_BsisAll = case_when(DSz_BsisAll ==  
1 ~ "DSz_BsisAll_01", DSz_BsisAll == 2 ~ "DSz_BsisAll_02",  
DSz_BsisAll == 3 ~ "DSz_BsisAll_03", DSz_BsisAll == 4 ~ "DSz_BsisAll_04",  
DSz_BsisAll == 5 ~ "DSz_BsisAll_05", DSz_BsisAll == 6 ~ "DSz_BsisAll_06",  
DSz_BsisAll == 7 ~ "DSz_BsisAll_07", DSz_BsisAll == 8 ~ "DSz_BsisAll_08",  
DSz_BsisAll == 9 ~ "DSz_BsisAll_09", DSz_BsisAll == 10 ~  
"DSz_BsisAll_10", DSz_BsisAll == 11 ~ "DSz_BsisAll_11",  
DSz_BsisAll == 12 ~ "DSz_BsisAll_12", DSz_BsisAll == 13 ~  
"DSz_BsisAll_13", DSz_BsisAll == 14 ~ "DSz_BsisAll_14",  
DSz_BsisAll == 15 ~ "DSz_BsisAll_15", DSz_BsisAll == 16 ~  
"DSz_BsisAll_16", DSz_BsisAll == 17 ~ "DSz_BsisAll_17",  
DSz_BsisAll == 18 ~ "DSz_BsisAll_18", DSz_BsisAll == 19 ~  
"DSz_BsisAll_19", DSz_BsisAll == 20 ~ "DSz_BsisAll_20",  
DSz_BsisAll == 88 ~ "88", DSz_BsisAll == 99 ~ "99")) %>%  
na.omit() %>% pivot_wider(id_cols = ADz_PartNum, names_from = DSz_BsisAll,  
values_from = Bsis_Checked, values_fill = list(Bsis_Checked = FALSE)) %>%  
select(-c("88"))
```

```
ScrnWhy <- Q1804dta %>% select(ADz_PartNum, EXz_ScrnWhyAll) %>%  
separate_rows(EXz_ScrnWhyAll) %>% mutate(ScrnWhy_Checked = TRUE) %>%  
mutate(EXz_ScrnWhyAll = case_when(EXz_ScrnWhyAll == 1 ~ "EXz_ScrnWhyAll_01",  
EXz_ScrnWhyAll == 2 ~ "EXz_ScrnWhyAll_02", EXz_ScrnWhyAll ==  
3 ~ "EXz_ScrnWhyAll_03", EXz_ScrnWhyAll == 4 ~ "EXz_ScrnWhyAll_04",  
EXz_ScrnWhyAll == 5 ~ "EXz_ScrnWhyAll_05", EXz_ScrnWhyAll ==  
6 ~ "EXz_ScrnWhyAll_06", EXz_ScrnWhyAll == 7 ~ "EXz_ScrnWhyAll_07",  
EXz_ScrnWhyAll == 8 ~ "EXz_ScrnWhyAll_08", EXz_ScrnWhyAll ==  
9 ~ "EXz_ScrnWhyAll_09", EXz_ScrnWhyAll == 10 ~ "EXz_ScrnWhyAll_10",  
EXz_ScrnWhyAll == 11 ~ "EXz_ScrnWhyAll_11", EXz_ScrnWhyAll ==  
12 ~ "EXz_ScrnWhyAll_12", EXz_ScrnWhyAll == 13 ~  
"EXz_ScrnWhyAll_13", EXz_ScrnWhyAll == 14 ~ "EXz_ScrnWhyAll_14",  
EXz_ScrnWhyAll == 15 ~ "EXz_ScrnWhyAll_15", EXz_ScrnWhyAll ==  
16 ~ "EXz_ScrnWhyAll_16", EXz_ScrnWhyAll == 17 ~  
"EXz_ScrnWhyAll_17", EXz_ScrnWhyAll == 18 ~ "EXz_ScrnWhyAll_18",  
EXz_ScrnWhyAll == 19 ~ "EXz_ScrnWhyAll_19", EXz_ScrnWhyAll ==
```



```

    20 ~ "EXz_ScrnWhyAll_20")) %>% na.omit() %>% pivot_wider(id_cols = ADz_PartNum,
names_from = EXz_ScrnWhyAll, values_from = ScrnWhy_Checked,
values_fill = list(ScrnWhy_Checked = FALSE))

```

```

WHCDecis <- Q1804dta %>% select(ADz_PartNum, GNz_WHCDecisAll) %>%
separate_rows(GNz_WHCDecisAll) %>% mutate(WHCDecis_Checked = TRUE) %>%
mutate(GNz_WHCDecisAll = case_when(GNz_WHCDecisAll == 1 ~
  "GNz_WHCDecisAll_01", GNz_WHCDecisAll == 2 ~ "GNz_WHCDecisAll_02",
  GNz_WHCDecisAll == 3 ~ "GNz_WHCDecisAll_03", GNz_WHCDecisAll ==
  4 ~ "GNz_WHCDecisAll_04", GNz_WHCDecisAll == 5 ~
  "GNz_WHCDecisAll_05", GNz_WHCDecisAll == 6 ~ "GNz_WHCDecisAll_06",
  GNz_WHCDecisAll == 7 ~ "GNz_WHCDecisAll_07", GNz_WHCDecisAll ==
  8 ~ "GNz_WHCDecisAll_08", GNz_WHCDecisAll == 9 ~
  "GNz_WHCDecisAll_09", GNz_WHCDecisAll == 10 ~ "GNz_WHCDecisAll_10",
  GNz_WHCDecisAll == 11 ~ "GNz_WHCDecisAll_11", GNz_WHCDecisAll ==
  12 ~ "GNz_WHCDecisAll_12", GNz_WHCDecisAll == 13 ~
  "GNz_WHCDecisAll_13", GNz_WHCDecisAll == 14 ~ "GNz_WHCDecisAll_14",
  GNz_WHCDecisAll == 15 ~ "GNz_WHCDecisAll_15", GNz_WHCDecisAll ==
  16 ~ "GNz_WHCDecisAll_16", GNz_WHCDecisAll == 17 ~
  "GNz_WHCDecisAll_17", GNz_WHCDecisAll == 18 ~ "GNz_WHCDecisAll_18",
  GNz_WHCDecisAll == 19 ~ "GNz_WHCDecisAll_19", GNz_WHCDecisAll ==
  20 ~ "GNz_WHCDecisAll_20", GNz_WHCDecisAll == 88 ~
  "88", GNz_WHCDecisAll == 99 ~ "99")) %>% na.omit() %>%
pivot_wider(id_cols = ADz_PartNum, names_from = GNz_WHCDecisAll,
values_from = WHCDecis_Checked, values_fill = list(WHCDecis_Checked = FALSE))

```

```

DecTrust <- Q1804dta %>% select(ADz_PartNum, HSz_DecTrust) %>%
separate_rows(HSz_DecTrust) %>% mutate(DecTrust_Checked = TRUE) %>%
mutate(HSz_DecTrust = case_when(HSz_DecTrust == 1 ~ "HSz_DecTrust_01",
  HSz_DecTrust == 2 ~ "HSz_DecTrust_02", HSz_DecTrust ==
  3 ~ "HSz_DecTrust_03", HSz_DecTrust == 4 ~ "HSz_DecTrust_04",
  HSz_DecTrust == 5 ~ "HSz_DecTrust_05", HSz_DecTrust ==
  6 ~ "HSz_DecTrust_06", HSz_DecTrust == 7 ~ "HSz_DecTrust_07",
  HSz_DecTrust == 8 ~ "HSz_DecTrust_08", HSz_DecTrust ==
  9 ~ "HSz_DecTrust_09", HSz_DecTrust == 10 ~ "HSz_DecTrust_10",
  HSz_DecTrust == 11 ~ "HSz_DecTrust_11", HSz_DecTrust ==
  12 ~ "HSz_DecTrust_12", HSz_DecTrust == 13 ~ "HSz_DecTrust_13",
  HSz_DecTrust == 14 ~ "HSz_DecTrust_14", HSz_DecTrust ==

```

```

    15 ~ "HSz_DecTrust_15", HSz_DecTrust == 16 ~ "HSz_DecTrust_16",
    HSz_DecTrust == 17 ~ "HSz_DecTrust_17", HSz_DecTrust ==
    18 ~ "HSz_DecTrust_18", HSz_DecTrust == 19 ~ "HSz_DecTrust_19",
    HSz_DecTrust == 20 ~ "HSz_DecTrust_20")) %>% pivot_wider(id_cols = ADz_PartNum,
names_from = HSz_DecTrust, values_from = DecTrust_Checked,
values_fill = list(DecTrust_Checked = FALSE))

```

```

InfluenceWho <- Q1804dta %>% select(ADz_PartNum, OPz_InfluenceWho) %>%
separate_rows(OPz_InfluenceWho) %>% mutate(InfluenceWho_Checked = TRUE) %>%
mutate(OPz_InfluenceWho = case_when(OPz_InfluenceWho == 1 ~
  "OPz_InfluenceWho_01", OPz_InfluenceWho == 2 ~ "OPz_InfluenceWho_02",
  OPz_InfluenceWho == 3 ~ "OPz_InfluenceWho_03", OPz_InfluenceWho ==
  4 ~ "OPz_InfluenceWho_04", OPz_InfluenceWho == 5 ~
  "OPz_InfluenceWho_05", OPz_InfluenceWho == 6 ~ "OPz_InfluenceWho_06",
  OPz_InfluenceWho == 7 ~ "OPz_InfluenceWho_07", OPz_InfluenceWho ==
  8 ~ "OPz_InfluenceWho_08", OPz_InfluenceWho == 9 ~
  "OPz_InfluenceWho_09", OPz_InfluenceWho == 10 ~ "OPz_InfluenceWho_10",
  OPz_InfluenceWho == 11 ~ "OPz_InfluenceWho_11", OPz_InfluenceWho ==
  12 ~ "OPz_InfluenceWho_12", OPz_InfluenceWho == 13 ~
  "OPz_InfluenceWho_13", OPz_InfluenceWho == 14 ~ "OPz_InfluenceWho_14",
  OPz_InfluenceWho == 15 ~ "OPz_InfluenceWho_15", OPz_InfluenceWho ==
  16 ~ "OPz_InfluenceWho_16", OPz_InfluenceWho == 17 ~
  "OPz_InfluenceWho_17", OPz_InfluenceWho == 18 ~ "OPz_InfluenceWho_18",
  OPz_InfluenceWho == 19 ~ "OPz_InfluenceWho_19", OPz_InfluenceWho ==
  20 ~ "OPz_InfluenceWho_20")) %>% pivot_wider(id_cols = ADz_PartNum,
names_from = OPz_InfluenceWho, values_from = InfluenceWho_Checked,
values_fill = list(InfluenceWho_Checked = FALSE)) %>% select(-c("NA"))

```

```

NoScrnRsn <- Q1804dta %>% select(ADz_PartNum, EXz_NoScrnRsn) %>%
separate_rows(EXz_NoScrnRsn) %>% mutate(NoScrnRsn_Checked = TRUE) %>%
mutate(EXz_NoScrnRsn = case_when(EXz_NoScrnRsn == 1 ~ "EXz_NoScrnRsn_01",
  EXz_NoScrnRsn == 2 ~ "EXz_NoScrnRsn_02", EXz_NoScrnRsn ==
  3 ~ "EXz_NoScrnRsn_03", EXz_NoScrnRsn == 4 ~ "EXz_NoScrnRsn_04",
  EXz_NoScrnRsn == 5 ~ "EXz_NoScrnRsn_05", EXz_NoScrnRsn ==
  6 ~ "EXz_NoScrnRsn_06", EXz_NoScrnRsn == 7 ~ "EXz_NoScrnRsn_07",
  EXz_NoScrnRsn == 8 ~ "EXz_NoScrnRsn_08", EXz_NoScrnRsn ==
  9 ~ "EXz_NoScrnRsn_09", EXz_NoScrnRsn == 10 ~ "EXz_NoScrnRsn_10",
  EXz_NoScrnRsn == 11 ~ "EXz_NoScrnRsn_11", EXz_NoScrnRsn ==

```

```

    12 ~ "EXz_NoScrnRsn_12", EXz_NoScrnRsn == 13 ~ "EXz_NoScrnRsn_13",
EXz_NoScrnRsn == 14 ~ "EXz_NoScrnRsn_14", EXz_NoScrnRsn ==
    15 ~ "EXz_NoScrnRsn_15", EXz_NoScrnRsn == 16 ~ "EXz_NoScrnRsn_16",
EXz_NoScrnRsn == 17 ~ "EXz_NoScrnRsn_17", EXz_NoScrnRsn ==
    18 ~ "EXz_NoScrnRsn_18", EXz_NoScrnRsn == 19 ~ "EXz_NoScrnRsn_19",
EXz_NoScrnRsn == 20 ~ "EXz_NoScrnRsn_20", EXz_NoScrnRsn ==
    NA ~ "NA")) %>% pivot_wider(id_cols = ADz_PartNum,
names_from = EXz_NoScrnRsn, values_from = NoScrnRsn_Checked,
values_fill = list(NoScrnRsn_Checked = FALSE)) %>% select(-c("NA"))

```

```

TreatNOWhy <- Q1804dta %>% select(ADz_PartNum, EXz_TreatNOWhy) %>%
  separate_rows(EXz_TreatNOWhy) %>% mutate(TreatNOWhy_Checked = TRUE) %>%
  mutate(EXz_TreatNOWhy = case_when(EXz_TreatNOWhy == 1 ~ "EXz_TreatNOWhy_01",
    EXz_TreatNOWhy == 2 ~ "EXz_TreatNOWhy_02", EXz_TreatNOWhy ==
    3 ~ "EXz_TreatNOWhy_03", EXz_TreatNOWhy == 4 ~ "EXz_TreatNOWhy_04",
    EXz_TreatNOWhy == 5 ~ "EXz_TreatNOWhy_05", EXz_TreatNOWhy ==
    6 ~ "EXz_TreatNOWhy_06", EXz_TreatNOWhy == 7 ~ "EXz_TreatNOWhy_07",
    EXz_TreatNOWhy == 8 ~ "EXz_TreatNOWhy_08", EXz_TreatNOWhy ==
    9 ~ "EXz_TreatNOWhy_09", EXz_TreatNOWhy == 10 ~ "EXz_TreatNOWhy_10",
    EXz_TreatNOWhy == 11 ~ "EXz_TreatNOWhy_11", EXz_TreatNOWhy ==
    12 ~ "EXz_TreatNOWhy_12", EXz_TreatNOWhy == 13 ~
    "EXz_TreatNOWhy_13", EXz_TreatNOWhy == 14 ~ "EXz_TreatNOWhy_14",
    EXz_TreatNOWhy == 15 ~ "EXz_TreatNOWhy_15", EXz_TreatNOWhy ==
    16 ~ "EXz_TreatNOWhy_16", EXz_TreatNOWhy == 17 ~
    "EXz_TreatNOWhy_17", EXz_TreatNOWhy == 18 ~ "EXz_TreatNOWhy_18",
    EXz_TreatNOWhy == 19 ~ "EXz_TreatNOWhy_19", EXz_TreatNOWhy ==
    20 ~ "EXz_TreatNOWhy_20")) %>% pivot_wider(id_cols = ADz_PartNum,
names_from = EXz_TreatNOWhy, values_from = TreatNOWhy_Checked,
values_fill = list(TreatNOWhy_Checked = FALSE)) %>% select(-c("NA"))

```

##Combine all expanded multi-select questions into the master dataset

```

Q1804dta_MSJoin <- Q1804dta
Q1804dta_MSJoin <- left_join(Q1804dta_MSJoin, LangPref, by = "ADz_PartNum")
Q1804dta_MSJoin <- left_join(Q1804dta_MSJoin, ServLang, by = "ADz_PartNum")
Q1804dta_MSJoin <- left_join(Q1804dta_MSJoin, LangInterp, by = "ADz_PartNum")
Q1804dta_MSJoin <- left_join(Q1804dta_MSJoin, CarePay, by = "ADz_PartNum")
Q1804dta_MSJoin <- left_join(Q1804dta_MSJoin, ProvTyp, by = "ADz_PartNum")

```

```

Q1804dta_MSJoin <- left_join(Q1804dta_MSJoin, Bsis, by = "ADz_PartNum")
Q1804dta_MSJoin <- left_join(Q1804dta_MSJoin, ScrnWhy, by = "ADz_PartNum")
Q1804dta_MSJoin <- left_join(Q1804dta_MSJoin, WHCDecis, by = "ADz_PartNum")
Q1804dta_MSJoin <- left_join(Q1804dta_MSJoin, DecTrust, by = "ADz_PartNum")
Q1804dta_MSJoin <- left_join(Q1804dta_MSJoin, InfluenceWho, by = "ADz_PartNum")
Q1804dta_MSJoin <- left_join(Q1804dta_MSJoin, NoScrnRsn, by = "ADz_PartNum")
Q1804dta_MSJoin <- left_join(Q1804dta_MSJoin, TreatNOWhy, by = "ADz_PartNum")

```

##Rename the factors of the multi-select variables

```

Q1804dta_MSJoin <- Q1804dta_MSJoin %>% mutate(SDz_LangPrefAll_01 = case_when(SDz_LangPrefAll_01 ==
  TRUE ~ "Yes", SDz_LangPrefAll_01 == FALSE ~ "No")) %>% mutate(SDz_LangPrefAll_02 = case_when(SDz_LangPrefAll_02 ==
  TRUE ~ "Yes", SDz_LangPrefAll_02 == FALSE ~ "No")) %>% mutate(SDz_LangPrefAll_06 = case_when(SDz_LangPrefAll_06 ==
  TRUE ~ "Yes", SDz_LangPrefAll_06 == FALSE ~ "No")) %>% mutate(SDz_LangPrefAll_07 = case_when(SDz_LangPrefAll_07 ==
  TRUE ~ "Yes", SDz_LangPrefAll_07 == FALSE ~ "No")) %>% mutate(HSz_ServLangAll_01 = case_when(HSz_ServLangAll_01 ==
  TRUE ~ "Yes", HSz_ServLangAll_01 == FALSE ~ "No")) %>% mutate(HSz_ServLangAll_02 = case_when(HSz_ServLangAll_02 ==
  TRUE ~ "Yes", HSz_ServLangAll_02 == FALSE ~ "No")) %>% mutate(HSz_ServLangAll_06 = case_when(HSz_ServLangAll_06 ==
  TRUE ~ "Yes", HSz_ServLangAll_06 == FALSE ~ "No")) %>% mutate(HSz_ServLangAll_07 = case_when(HSz_ServLangAll_07 ==
  TRUE ~ "Yes", HSz_ServLangAll_07 == FALSE ~ "No")) %>% mutate(HSz_LangInterpAll_06 = case_when(HSz_LangInterpAll_06 ==
  TRUE ~ "Yes", HSz_LangInterpAll_06 == FALSE ~ "No")) %>%
  mutate(HSz_LangInterpAll_07 = case_when(HSz_LangInterpAll_07 ==
    TRUE ~ "No", HSz_LangInterpAll_07 == FALSE ~ "Yes")) %>%
  mutate(HSz_LangInterpAll_02 = case_when(HSz_LangInterpAll_02 ==
    TRUE ~ "Yes", HSz_LangInterpAll_02 == FALSE ~ "No")) %>%
  mutate(BAF_CarePayAll_01 = case_when(BAF_CarePayAll_01 ==
    TRUE ~ "Yes", BAF_CarePayAll_01 == FALSE ~ "No")) %>%
  mutate(BAF_CarePayAll_08 = case_when(BAF_CarePayAll_08 ==
    TRUE ~ "Yes", BAF_CarePayAll_08 == FALSE ~ "No")) %>%
  mutate(BAF_CarePayAll_02 = case_when(BAF_CarePayAll_02 ==
    TRUE ~ "Yes", BAF_CarePayAll_02 == FALSE ~ "No")) %>%
  mutate(BAF_CarePayAll_04 = case_when(BAF_CarePayAll_04 ==
    TRUE ~ "Yes", BAF_CarePayAll_04 == FALSE ~ "No")) %>%
  mutate(BAF_CarePayAll_10 = case_when(BAF_CarePayAll_10 ==
    TRUE ~ "Yes", BAF_CarePayAll_10 == FALSE ~ "No")) %>%
  mutate(BAF_CarePayAll_09 = case_when(BAF_CarePayAll_09 ==
    TRUE ~ "Yes", BAF_CarePayAll_09 == FALSE ~ "No")) %>%
  mutate(GNz_WHCDecisAll_01 = case_when(GNz_WHCDecisAll_01 ==
    TRUE ~ "Yes", GNz_WHCDecisAll_01 == FALSE ~ "No")) %>%

```

```

mutate(GNz_WHCDecisAll_02 = case_when(GNz_WHCDecisAll_02 ==
  TRUE ~ "Yes", GNz_WHCDecisAll_02 == FALSE ~ "No")) %>%
mutate(HSz_DecTrust_02 = case_when(HSz_DecTrust_02 == TRUE ~
  "Yes", HSz_DecTrust_02 == FALSE ~ "No")) %>% mutate(HSz_DecTrust_07 = case_when(HSz_DecTrust_07 ==
TRUE ~ "Yes", HSz_DecTrust_07 == FALSE ~ "No")) %>% mutate(HSz_DecTrust_04 = case_when(HSz_DecTrust_04 ==
TRUE ~ "Yes", HSz_DecTrust_04 == FALSE ~ "No")) %>% mutate(HSz_DecTrust_06 = case_when(HSz_DecTrust_06 ==
TRUE ~ "Yes", HSz_DecTrust_06 == FALSE ~ "No")) %>% mutate(HSz_DecTrust_08 = case_when(HSz_DecTrust_08 ==
TRUE ~ "Yes", HSz_DecTrust_08 == FALSE ~ "No")) %>% mutate(HSz_DecTrust_03 = case_when(HSz_DecTrust_03 ==
TRUE ~ "Yes", HSz_DecTrust_03 == FALSE ~ "No")) %>% mutate(HSz_DecTrust_01 = case_when(HSz_DecTrust_01 ==
TRUE ~ "Yes", HSz_DecTrust_01 == FALSE ~ "No")) %>% mutate(OPz_InfluenceWho_04 = case_when(OPz_InfluenceWho_04 ==
TRUE ~ "Yes", OPz_InfluenceWho_04 == FALSE ~ "No")) %>% mutate(OPz_InfluenceWho_01 = case_when(OPz_InfluenceWho_01 ==
TRUE ~ "Yes", OPz_InfluenceWho_01 == FALSE ~ "No")) %>% mutate(OPz_InfluenceWho_02 = case_when(OPz_InfluenceWho_02 ==
TRUE ~ "Yes", OPz_InfluenceWho_02 == FALSE ~ "No")) %>% mutate(OPz_InfluenceWho_09 = case_when(OPz_InfluenceWho_09 ==
TRUE ~ "Yes", OPz_InfluenceWho_09 == FALSE ~ "No")) %>% mutate(OPz_InfluenceWho_06 = case_when(OPz_InfluenceWho_06 ==
TRUE ~ "Yes", OPz_InfluenceWho_06 == FALSE ~ "No"))

```

#Table 1. Demographics by gender

```

Demographics <- Q1804dta_MSJoin %>% select(SDz_Gender, SDz_Age,
  SDz_Educacn, SCz_MaritalStat, SDz_LangPrefAll_01, SDz_LangPrefAll_02,
  SDz_LangPrefAll_06, SDz_LangPrefAll_07, BEz_Screend) %>%
mutate(SDz_Gender = case_when(SDz_Gender == 0 ~ "Female",
  SDz_Gender == 1 ~ "Male")) %>% mutate(SDz_Educacn = case_when(SDz_Educacn ==
0 ~ "0) None", SDz_Educacn == 1 ~ "1) Quranic School", SDz_Educacn ==
2 ~ "2) Primary education", SDz_Educacn == 3 ~ "3) Secondary school through university",
SDz_Educacn == 4 ~ "3) Secondary school through university",
SDz_Educacn == 5 ~ "3) Secondary school through university",
SDz_Educacn == 99 ~ "Do Not Know / Not Sure")) %>% mutate(SCz_MaritalStat = case_when(SCz_MaritalStat ==
1 ~ "1) Single, divorced, separated, or widowed", SCz_MaritalStat ==
2 ~ "2) Married (monogamous household)", SCz_MaritalStat ==
3 ~ "3) Married (polygamous household)", SCz_MaritalStat ==
4 ~ "4) Living as married / cohabitating", SCz_MaritalStat ==
5 ~ "1) Single, divorced, separated, or widowed", SCz_MaritalStat ==
6 ~ "1) Single, divorced, separated, or widowed", SCz_MaritalStat ==
99 ~ "Do Not Know / Not Sure")) %>% mutate(BEz_Screend = case_when(BEz_Screend ==
0 ~ "0) Never screened", BEz_Screend == 1 ~ "1) One time only",
BEz_Screend == 2 ~ "2) More than one time", BEz_Screend ==
99 ~ "Do Not Know / Not Sure"))

```

```

TA_DemographicsGen <- tableby(SDz_Gender ~ anova(SDz_Age, "meansd",
  "range") + fe(SDz_Educate, "countpct") + fe(SCz_MaritalStat,
  "countpct") + fe(SDz_LangPrefAll_01, "countpct") + fe(SDz_LangPrefAll_02,
  "countpct") + fe(SDz_LangPrefAll_06, "countpct") + fe(SDz_LangPrefAll_07,
  "countpct") + fe(BEz_Screend, "countpct"), simulate.p.value = TRUE,
  data = Demographics)

labels(TA_DemographicsGen) <- c(SDz_Gender = "Gender", SDz_Age = "Age in years",
  SDz_Educate = "Education level", SCz_MaritalStat = "Marital status",
  BEz_Screend = "Screened for cervical cancer", SDz_LangPrefAll_01 = "Malinke speaker",
  SDz_LangPrefAll_02 = "Pulaar speaker", SDz_LangPrefAll_06 = "Wolof speaker",
  SDz_LangPrefAll_07 = "French speaker")

summary(TA_DemographicsGen, title = "Arsenal Table 18Q04", pfootnote = TRUE)

```

```

##
## Table: Arsenal Table 18Q04
##
## |
## |:-----:|:-----:|:-----:|:-----:|
## |**Age in years**| | | | | 0.006^1^|
## |&nbsp;&nbsp;&nbsp;Mean (SD)| 40.168 (8.631) | 44.140 (8.355) | 41.601 (8.718) | |
## |&nbsp;&nbsp;&nbsp;Range| 30.000 - 59.000 | 30.000 - 59.000 | 30.000 - 59.000 | |
## |**Education level**| | | | | < 0.001^2^|
## |&nbsp;&nbsp;&nbsp;0) None| 26 (25.7%) | 5 (8.9%) | 31 (19.7%) | |
## |&nbsp;&nbsp;&nbsp;1) Quranic School| 35 (34.7%) | 21 (37.5%) | 56 (35.7%) | |
## |&nbsp;&nbsp;&nbsp;2) Primary education| 37 (36.6%) | 17 (30.4%) | 54 (34.4%) | |
## |&nbsp;&nbsp;&nbsp;3) Secondary school through university| 3 (3.0%) | 13 (23.2%) | 16 (10.2%) | |
## |**Marital status**| | | | | 0.068^2^|
## |&nbsp;&nbsp;&nbsp;1) Single, divorced, separated, or widowed| 8 (7.9%) | 3 (5.3%) | 11 (7.0%) | |
## |&nbsp;&nbsp;&nbsp;2) Married (monogamous household)| 41 (40.6%) | 34 (59.6%) | 75 (47.5%) | |
## |&nbsp;&nbsp;&nbsp;3) Married (polygamous household)| 52 (51.5%) | 20 (35.1%) | 72 (45.6%) | |
## |**Malinke speaker**| | | | | 0.733^3^|
## |&nbsp;&nbsp;&nbsp;No| 39 (38.6%) | 20 (35.1%) | 59 (37.3%) | |
## |&nbsp;&nbsp;&nbsp;Yes| 62 (61.4%) | 37 (64.9%) | 99 (62.7%) | |
## |**Pulaar speaker**| | | | | 0.019^3^|
## |&nbsp;&nbsp;&nbsp;No| 48 (47.5%) | 16 (28.1%) | 64 (40.5%) | |
## |&nbsp;&nbsp;&nbsp;Yes| 53 (52.5%) | 41 (71.9%) | 94 (59.5%) | |

```









```
# here('Tables', 'T02_Power_Gendr.html'))
```

#Table 3. Adapted everyday discrimination scale by gender

```
Discr_Gendr <- Q1804dta_MSJoin %>% select(SDz_Gender, DSz_RespGen,  
  DSz_RespPrtn, DSz_Smrt, DSz_Hnst, DSz_Thret) %>% mutate(SDz_Gender = case_when(SDz_Gender ==  
  0 ~ "0) Female", SDz_Gender == 1 ~ "1) Male")) %>% mutate(DSz_RespGen = case_when(DSz_RespGen ==  
  1 ~ "1) Every day", DSz_RespGen == 2 ~ "2) Every week", DSz_RespGen ==  
  3 ~ "3) A few times per year", DSz_RespGen == 4 ~ "4) A few times in my life",  
  DSz_RespGen == 5 ~ "5) Never", DSz_RespGen == 99 ~ "Do Not Know / Not Sure")) %>%  
  mutate(DSz_RespPrtn = case_when(DSz_RespPrtn == 1 ~ "1) Every day",  
    DSz_RespPrtn == 2 ~ "2) Every week", DSz_RespPrtn ==  
      3 ~ "3) A few times per year", DSz_RespPrtn == 4 ~  
        "4) A few times in my life", DSz_RespPrtn == 5 ~  
          "5) Never", DSz_RespPrtn == 99 ~ "Do Not Know / Not Sure")) %>%  
  mutate(DSz_Smrt = case_when(DSz_Smrt == 1 ~ "1) Every day",  
    DSz_Smrt == 2 ~ "2) Every week", DSz_Smrt == 3 ~ "3) A few times per year",  
    DSz_Smrt == 4 ~ "4) A few times in my life", DSz_Smrt ==  
      5 ~ "5) Never", DSz_Smrt == 99 ~ "Do Not Know / Not Sure")) %>%  
  mutate(DSz_Hnst = case_when(DSz_Hnst == 1 ~ "1) Every day",  
    DSz_Hnst == 2 ~ "2) Every week", DSz_Hnst == 3 ~ "3) A few times per year",  
    DSz_Hnst == 4 ~ "4) A few times in my life", DSz_Hnst ==  
      5 ~ "5) Never", DSz_Hnst == 99 ~ "Do Not Know / Not Sure")) %>%  
  mutate(DSz_Thret = case_when(DSz_Thret == 1 ~ "1) Every day",  
    DSz_Thret == 2 ~ "2) Every week", DSz_Thret == 3 ~ "3) A few times per year",  
    DSz_Thret == 4 ~ "4) A few times in my life", DSz_Thret ==  
      5 ~ "5) Never", DSz_Thret == 99 ~ "Do Not Know / Not Sure"))  
  
TA_Discr_Gendr <- tableby(SDz_Gender ~ fe(DSz_RespGen, "countpct") +  
  fe(DSz_RespPrtn, "countpct") + fe(DSz_Smrt, "countpct") +  
  fe(DSz_Hnst, "countpct") + fe(DSz_Thret, "countpct"), simulate.p.value = TRUE,  
  data = Discr_Gendr)  
  
labels(TA_Discr_Gendr) <- c(DSz_RespGen = "Feel treated with less courtesy or respect than others",  
  DSz_RespPrtn = "Feel treated with less courtesy or respect by their spouse",  
  DSz_Smrt = "Feel that others act as if they are not smart",  
  DSz_Hnst = "Feel perceived as being dishonest", DSz_Thret = "Feel threatened by others")
```



```

# write2pdf(TA_Discr_Gendr,
# here('Tables', 'T03_Discr_Gendr.pdf'))
# write2word(TA_Discr_Gendr,
# here('Tables', 'T03_Discr_Gendr.doc'))
# write2html(TA_Discr_Gendr,
# here('Tables', 'T03_Discr_Gendr.html'))

```

#Table 4. Adapted cancer stigma scale by gender

```

Stigma_Gendr <- Q1804dta_MSJoin %>% select(SDz_Gender, STz_CAAbnl,
  STz_CAComfNear, STz_CANeedsPriority, STz_CAPtFault, STz_CAFeelPity,
  STz_CADxFear, OPz_CAWorry) %>% mutate(SDz_Gender = case_when(SDz_Gender ==
  0 ~ "0) Female", SDz_Gender == 1 ~ "1) Male")) %>% mutate(STz_CAAbnl = case_when(STz_CAAbnl ==
  1 ~ "1) Strongly Disagree", STz_CAAbnl == 2 ~ "2) Disagree",
  STz_CAAbnl == 3 ~ "3) Undecided", STz_CAAbnl == 4 ~ "4) Agree",
  STz_CAAbnl == 5 ~ "5) Strongly Agree")) %>% mutate(STz_CAComfNear = case_when(STz_CAComfNear ==
  1 ~ "1) Strongly Disagree", STz_CAComfNear == 2 ~ "2) Disagree",
  STz_CAComfNear == 3 ~ "3) Undecided", STz_CAComfNear == 4 ~
  "4) Agree", STz_CAComfNear == 5 ~ "5) Strongly Agree")) %>%
  mutate(STz_CANeedsPriority = case_when(STz_CANeedsPriority ==
  1 ~ "1) Strongly Disagree", STz_CANeedsPriority == 2 ~
  "2) Disagree", STz_CANeedsPriority == 3 ~ "3) Undecided",
  STz_CANeedsPriority == 4 ~ "4) Agree", STz_CANeedsPriority ==
  5 ~ "5) Strongly Agree")) %>% mutate(STz_CAPtFault = case_when(STz_CAPtFault ==
  1 ~ "1) Strongly Disagree", STz_CAPtFault == 2 ~ "2) Disagree",
  STz_CAPtFault == 3 ~ "3) Undecided", STz_CAPtFault == 4 ~
  "4) Agree", STz_CAPtFault == 5 ~ "5) Strongly Agree")) %>%
  mutate(STz_CAFeelPity = case_when(STz_CAFeelPity == 1 ~ "1) Strongly Disagree",
  STz_CAFeelPity == 2 ~ "2) Disagree", STz_CAFeelPity ==
  3 ~ "3) Undecided", STz_CAFeelPity == 4 ~ "4) Agree",
  STz_CAFeelPity == 5 ~ "5) Strongly Agree")) %>% mutate(STz_CADxFear = case_when(STz_CADxFear ==
  1 ~ "1) Strongly Disagree", STz_CADxFear == 2 ~ "2) Disagree",
  STz_CADxFear == 3 ~ "3) Undecided", STz_CADxFear == 4 ~ "4) Agree",
  STz_CADxFear == 5 ~ "5) Strongly Agree")) %>% mutate(OPz_CAWorry = case_when(OPz_CAWorry ==
  1 ~ "1) Strongly Disagree", OPz_CAWorry == 2 ~ "2) Disagree",
  OPz_CAWorry == 3 ~ "3) Undecided", OPz_CAWorry == 4 ~ "4) Agree",
  OPz_CAWorry == 5 ~ "5) Strongly Agree"))

```

```

TA_Stgma_Gendr <- tableby(SDz_Gender ~ fe(STz_CAComfNear, "countpct") +
  fe(STz_CAAbnl, "countpct") + fe(STz_CANeedsPriority, "countpct") +
  fe(STz_CAPtFault, "countpct") + fe(STz_CAFeelPity, "countpct") +
  fe(STz_CADxFear, "countpct") + fe(OPz_CAWorry, "countpct"),
  simulate.p.value = TRUE, data = Stgma_Gendr)

labels(TA_Stgma_Gendr) <- c(STz_CAAbnl = "Once youve had cancer youre never normal again.",
  STz_CAComfNear = "I would not feel comfortable around someone with cancer.",
  STz_CANeedsPriority = "The health care needs of people with cancer should not be prioritized.",
  STz_CAPtFault = "If a person has cancer its probably their fault.",
  STz_CAFeelPity = " I would feel sorry for someone with cancer.",
  STz_CADxFear = "I feel that cancer is more frightening than most other diseases.",
  OPz_CAWorry = "Other women often state that they are worried about getting cancer.")

summary(TA_Stgma_Gendr, title = "Arsenal Table 18Q04", pfootnote = TRUE)

```

```
##
```

```
## Table: Arsenal Table 18Q04
```

```
##
```

| ##                                                                                     | 0) Female (N=101) | 1) Male (N=57) | Total (N=158) | p    |
|----------------------------------------------------------------------------------------|-------------------|----------------|---------------|------|
| ##   :-----:   :-----:   :-----:   :-----:                                             |                   |                |               |      |
| ##   <b>**I would not feel comfortable around someone with cancer.**</b>               |                   |                |               | < 0. |
| ##                     1) Strongly Disagree                                            | 11 (11.0%)        | 11 (19.6%)     | 22 (14.1%)    |      |
| ##                     2) Disagree                                                     | 44 (44.0%)        | 31 (55.4%)     | 75 (48.1%)    |      |
| ##                     3) Undecided                                                    | 1 (1.0%)          | 4 (7.1%)       | 5 (3.2%)      |      |
| ##                     4) Agree                                                        | 19 (19.0%)        | 9 (16.1%)      | 28 (17.9%)    |      |
| ##                     5) Strongly Agree                                               | 25 (25.0%)        | 1 (1.8%)       | 26 (16.7%)    |      |
| ##   <b>**Once youve had cancer youre never normal again.**</b>                        |                   |                |               | < 0. |
| ##                     1) Strongly Disagree                                            | 2 (2.0%)          | 7 (12.5%)      | 9 (5.8%)      |      |
| ##                     2) Disagree                                                     | 8 (8.0%)          | 12 (21.4%)     | 20 (12.8%)    |      |
| ##                     3) Undecided                                                    | 2 (2.0%)          | 9 (16.1%)      | 11 (7.1%)     |      |
| ##                     4) Agree                                                        | 31 (31.0%)        | 23 (41.1%)     | 54 (34.6%)    |      |
| ##                     5) Strongly Agree                                               | 57 (57.0%)        | 5 (8.9%)       | 62 (39.7%)    |      |
| ##   <b>**The health care needs of people with cancer should not be prioritized.**</b> |                   |                |               | < 0. |
| ##                     1) Strongly Disagree                                            | 9 (9.1%)          | 18 (32.1%)     | 27 (17.4%)    |      |
| ##                     2) Disagree                                                     | 24 (24.2%)        | 31 (55.4%)     | 55 (35.5%)    |      |
| ##                     3) Undecided                                                    | 3 (3.0%)          | 2 (3.6%)       | 5 (3.2%)      |      |
| ##                     4) Agree                                                        | 31 (31.3%)        | 2 (3.6%)       | 33 (21.3%)    |      |



```

Attd_Gendr <- Q1804dta_MSJoin %>% select(SDz_Gender, BEz_Screend,
  ATz_BnfComf, ATz_MyDxSlfKno, ATz_MyDxFamKno, ATz_FamDxMyKno,
  ATz_DxFate) %>% mutate(SDz_Gender = case_when(SDz_Gender ==
  0 ~ "0) Female", SDz_Gender == 1 ~ "1) Male")) %>% mutate(ATz_BnfComf = case_when(ATz_BnfComf ==
  1 ~ "1) Strongly Disagree", ATz_BnfComf == 2 ~ "2) Disagree",
  ATz_BnfComf == 3 ~ "3) Undecided", ATz_BnfComf == 4 ~ "4) Agree",
  ATz_BnfComf == 5 ~ "5) Strongly Agree")) %>% mutate(ATz_MyDxSlfKno = case_when(ATz_MyDxSlfKno ==
  1 ~ "1) Strongly Disagree", ATz_MyDxSlfKno == 2 ~ "2) Disagree",
  ATz_MyDxSlfKno == 3 ~ "3) Undecided", ATz_MyDxSlfKno == 4 ~
  "4) Agree", ATz_MyDxSlfKno == 5 ~ "5) Strongly Agree")) %>%
mutate(ATz_MyDxFamKno = case_when(ATz_MyDxFamKno == 1 ~ "1) Strongly Disagree",
  ATz_MyDxFamKno == 2 ~ "2) Disagree", ATz_MyDxFamKno ==
  3 ~ "3) Undecided", ATz_MyDxFamKno == 4 ~ "4) Agree",
  ATz_MyDxFamKno == 5 ~ "5) Strongly Agree")) %>% mutate(ATz_FamDxMyKno = case_when(ATz_FamDxMyKno ==
  1 ~ "1) Strongly Disagree", ATz_FamDxMyKno == 2 ~ "2) Disagree",
  ATz_FamDxMyKno == 3 ~ "3) Undecided", ATz_FamDxMyKno == 4 ~
  "4) Agree", ATz_FamDxMyKno == 5 ~ "5) Strongly Agree")) %>%
mutate(ATz_DxFate = case_when(ATz_DxFate == 1 ~ "1) Strongly Disagree",
  ATz_DxFate == 2 ~ "2) Disagree", ATz_DxFate == 3 ~ "3) Undecided",
  ATz_DxFate == 4 ~ "4) Agree", ATz_DxFate == 5 ~ "5) Strongly Agree"))

TA_Attd_Gendr <- tableby(SDz_Gender ~ fe(ATz_BnfComf, "countpct") +
  fe(ATz_MyDxSlfKno, "countpct") + fe(ATz_MyDxFamKno, "countpct") +
  fe(ATz_FamDxMyKno, "countpct") + fe(ATz_DxFate, "countpct"),
  simulate.p.value = TRUE, data = Attd_Gendr)

labels(TA_Attd_Gendr) <- c(ATz_BnfComf = "Cancer testing or treatment that is unpleasant is worth getting if it would help me to live long",
  ATz_MyDxSlfKno = "If I had cancer, I would want to know that I have it",
  ATz_MyDxFamKno = "If I had cancer, I would want my family to know that I have it.",
  ATz_FamDxMyKno = "If someone else in my family had cancer, I would want to know that they have it.",
  ATz_DxFate = "Getting a serious disease like cancer is fate, there is nothing I can do to change fate")

summary(TA_Attd_Gendr, title = "Arsenal Table 18Q04", pfootnote = TRUE)

```

```
##
```

```
## Table: Arsenal Table 18Q04
```

```
##
```

```
## |
```

```
| 0) Female (N=101) | 1) Male (
```





#Table 6. Cervical cancer screening recommendation by gender

```

ScrnRec_Gendr <- Q1804dta_MSJoin %>% select(SDz_Gender, OPz_ScrnWRec,
  OPz_ScrnRecOthrs, GNz_WRole, GNz_ManDecis, OPz_InfluenceWho_01,
  OPz_InfluenceWho_04, OPz_InfluenceWho_02, OPz_InfluenceWho_06,
  OPz_InfluenceWho_09, HSz_DecTrust_02, HSz_DecTrust_07, HSz_DecTrust_04,
  HSz_DecTrust_06, HSz_DecTrust_08, HSz_DecTrust_03, HSz_DecTrust_01,
  GNz_WHCDecisAll_01, GNz_WHCDecisAll_02) %>% mutate(SDz_Gender = case_when(SDz_Gender ==
  0 ~ "0) Female", SDz_Gender == 1 ~ "1) Male")) %>% mutate(OPz_ScrnWRec = case_when(OPz_ScrnWRec ==
  1 ~ "1) Strongly Disagree", OPz_ScrnWRec == 2 ~ "2) Disagree",
  OPz_ScrnWRec == 3 ~ "3) Undecided", OPz_ScrnWRec == 4 ~ "4) Agree",
  OPz_ScrnWRec == 5 ~ "5) Strongly Agree")) %>% mutate(OPz_ScrnRecOthrs = case_when(OPz_ScrnRecOthrs ==
  1 ~ "1) Strongly Disagree", OPz_ScrnRecOthrs == 2 ~ "2) Disagree",
  OPz_ScrnRecOthrs == 3 ~ "3) Undecided", OPz_ScrnRecOthrs ==
  4 ~ "4) Agree", OPz_ScrnRecOthrs == 5 ~ "5) Strongly Agree")) %>%
mutate(GNz_WRole = case_when(GNz_WRole == 1 ~ "1) Strongly Disagree",
  GNz_WRole == 2 ~ "2) Disagree", GNz_WRole == 3 ~ "3) Undecided",
  GNz_WRole == 4 ~ "4) Agree", GNz_WRole == 5 ~ "5) Strongly Agree")) %>%
mutate(GNz_ManDecis = case_when(GNz_ManDecis == 1 ~ "1) Strongly Disagree",
  GNz_ManDecis == 2 ~ "2) Disagree", GNz_ManDecis == 3 ~
  "3) Undecided", GNz_ManDecis == 4 ~ "4) Agree", GNz_ManDecis ==
  5 ~ "5) Strongly Agree"))

TA_ScrnRec_Gendr <- tableby(SDz_Gender ~ fe(OPz_ScrnWRec, "countpct") +
  fe(OPz_ScrnRecOthrs, "countpct"), simulate.p.value = TRUE,
  data = ScrnRec_Gendr)

# OPz_ScrnWRec, OPz_ScrnRecOthrs, GNz_WRole, GNz_ManDecis,

labels(TA_ScrnRec_Gendr) <- c(OPz_ScrnWRec = "Other women that I know recommend the cervical cancer test",
  OPz_ScrnRecOthrs = "I would recommend that women get routine testing for cervical cancer")

summary(TA_ScrnRec_Gendr, title = "Arsenal Table 18Q04", pfootnote = TRUE)

##
## Table: Arsenal Table 18Q04
##
## | | 0) Female (N=101) | 1) Male (N=57) | Total (N=158) | p val
## |:-:-----:|:-:-----:|:-:-----:|:-:-----:|:-:-----:

```





```

SDz_Educatn == 1 ~ "0 Low Educ", SDz_Educatn == 2 ~ "1 sm Educ",
SDz_Educatn == 3 ~ "1 sm Educ", SDz_Educatn == 4 ~ "High Educ",
SDz_Educatn == 5 ~ "High Educ", SDz_Educatn == 99 ~ "Do Not Know / Not Sure")) %>%
mutate(STz_CAAbnl = case_when(STz_CAAbnl == 1 ~ "1) Strongly Disagree",
  STz_CAAbnl == 2 ~ "2) Disagree", STz_CAAbnl == 3 ~ "3) Undecided",
  STz_CAAbnl == 4 ~ "4) Agree", STz_CAAbnl == 5 ~ "5) Strongly Agree")) %>%
mutate(STz_CAComfNear = case_when(STz_CAComfNear == 1 ~ "1) Strongly Disagree",
  STz_CAComfNear == 2 ~ "2) Disagree", STz_CAComfNear ==
  3 ~ "3) Undecided", STz_CAComfNear == 4 ~ "4) Agree",
  STz_CAComfNear == 5 ~ "5) Strongly Agree")) %>% mutate(STz_CANeedsPriority = case_when(STz_CANeedsPriority ==
1 ~ "1) Strongly Disagree", STz_CANeedsPriority == 2 ~ "2) Disagree",
STz_CANeedsPriority == 3 ~ "3) Undecided", STz_CANeedsPriority ==
  4 ~ "4) Agree", STz_CANeedsPriority == 5 ~ "5) Strongly Agree")) %>%
mutate(STz_CAPtFault = case_when(STz_CAPtFault == 1 ~ "1) Strongly Disagree",
  STz_CAPtFault == 2 ~ "2) Disagree", STz_CAPtFault ==
  3 ~ "3) Undecided", STz_CAPtFault == 4 ~ "4) Agree",
  STz_CAPtFault == 5 ~ "5) Strongly Agree")) %>% mutate(STz_CAFeelPity = case_when(STz_CAFeelPity ==
1 ~ "1) Strongly Disagree", STz_CAFeelPity == 2 ~ "2) Disagree",
STz_CAFeelPity == 3 ~ "3) Undecided", STz_CAFeelPity == 4 ~
  "4) Agree", STz_CAFeelPity == 5 ~ "5) Strongly Agree")) %>%
mutate(STz_CADxFear = case_when(STz_CADxFear == 1 ~ "1) Strongly Disagree",
  STz_CADxFear == 2 ~ "2) Disagree", STz_CADxFear == 3 ~
  "3) Undecided", STz_CADxFear == 4 ~ "4) Agree", STz_CADxFear ==
  5 ~ "5) Strongly Agree")) %>% mutate(OPz_CAWorry = case_when(OPz_CAWorry ==
1 ~ "1) Strongly Disagree", OPz_CAWorry == 2 ~ "2) Disagree",
OPz_CAWorry == 3 ~ "3) Undecided", OPz_CAWorry == 4 ~ "4) Agree",
OPz_CAWorry == 5 ~ "5) Strongly Agree")) %>% mutate(DSz_RespGen = case_when(DSz_RespGen ==
1 ~ "1) Every day", DSz_RespGen == 2 ~ "2) Every week", DSz_RespGen ==
3 ~ "3) A few times per year", DSz_RespGen == 4 ~ "4) A few times in my life",
DSz_RespGen == 5 ~ "5) Never", DSz_RespGen == 99 ~ "Do Not Know / Not Sure")) %>%
mutate(DSz_RespPrtn = case_when(DSz_RespPrtn == 1 ~ "1) Every day",
  DSz_RespPrtn == 2 ~ "2) Every week", DSz_RespPrtn ==
  3 ~ "3) A few times per year", DSz_RespPrtn == 4 ~
  "4) A few times in my life", DSz_RespPrtn == 5 ~
  "5) Never", DSz_RespPrtn == 99 ~ "Do Not Know / Not Sure")) %>%
mutate(DSz_Smrt = case_when(DSz_Smrt == 1 ~ "1) Every day",
  DSz_Smrt == 2 ~ "2) Every week", DSz_Smrt == 3 ~ "3) A few times per year",
  DSz_Smrt == 4 ~ "4) A few times in my life", DSz_Smrt ==

```

```

    5 ~ "5) Never", DSz_Smrt == 99 ~ "Do Not Know / Not Sure")) %>%
mutate(DSz_Hnst = case_when(DSz_Hnst == 1 ~ "1) Every day",
  DSz_Hnst == 2 ~ "2) Every week", DSz_Hnst == 3 ~ "3) A few times per year",
  DSz_Hnst == 4 ~ "4) A few times in my life", DSz_Hnst ==
    5 ~ "5) Never", DSz_Hnst == 99 ~ "Do Not Know / Not Sure")) %>%
mutate(DSz_Thret = case_when(DSz_Thret == 1 ~ "1) Every day",
  DSz_Thret == 2 ~ "2) Every week", DSz_Thret == 3 ~ "3) A few times per year",
  DSz_Thret == 4 ~ "4) A few times in my life", DSz_Thret ==
    5 ~ "5) Never", DSz_Thret == 99 ~ "Do Not Know / Not Sure")) %>%
mutate(ATz_BnfComf = case_when(ATz_BnfComf == 1 ~ "1) Strongly Disagree",
  ATz_BnfComf == 2 ~ "2) Disagree", ATz_BnfComf == 3 ~
    "3) Undecided", ATz_BnfComf == 4 ~ "4) Agree", ATz_BnfComf ==
    5 ~ "5) Strongly Agree")) %>% mutate(ATz_MyDxSlfKno = case_when(ATz_MyDxSlfKno ==
1 ~ "1) Strongly Disagree", ATz_MyDxSlfKno == 2 ~ "2) Disagree",
ATz_MyDxSlfKno == 3 ~ "3) Undecided", ATz_MyDxSlfKno == 4 ~
  "4) Agree", ATz_MyDxSlfKno == 5 ~ "5) Strongly Agree")) %>%
mutate(ATz_MyDxFamKno = case_when(ATz_MyDxFamKno == 1 ~ "1) Strongly Disagree",
  ATz_MyDxFamKno == 2 ~ "2) Disagree", ATz_MyDxFamKno ==
    3 ~ "3) Undecided", ATz_MyDxFamKno == 4 ~ "4) Agree",
  ATz_MyDxFamKno == 5 ~ "5) Strongly Agree")) %>% mutate(ATz_FamDxMyKno = case_when(ATz_FamDxMyKno ==
1 ~ "1) Strongly Disagree", ATz_FamDxMyKno == 2 ~ "2) Disagree",
ATz_FamDxMyKno == 3 ~ "3) Undecided", ATz_FamDxMyKno == 4 ~
  "4) Agree", ATz_FamDxMyKno == 5 ~ "5) Strongly Agree")) %>%
mutate(ATz_DxFate = case_when(ATz_DxFate == 1 ~ "1) Strongly Disagree",
  ATz_DxFate == 2 ~ "2) Disagree", ATz_DxFate == 3 ~ "3) Undecided",
  ATz_DxFate == 4 ~ "4) Agree", ATz_DxFate == 5 ~ "5) Strongly Agree")) %>%
mutate(OPz_ScrnWRec = case_when(OPz_ScrnWRec == 1 ~ "1) Strongly Disagree",
  OPz_ScrnWRec == 2 ~ "2) Disagree", OPz_ScrnWRec == 3 ~
    "3) Undecided", OPz_ScrnWRec == 4 ~ "4) Agree", OPz_ScrnWRec ==
    5 ~ "5) Strongly Agree")) %>% mutate(OPz_ScrnRecOthrs = case_when(OPz_ScrnRecOthrs ==
1 ~ "1) Strongly Disagree", OPz_ScrnRecOthrs == 2 ~ "2) Disagree",
OPz_ScrnRecOthrs == 3 ~ "3) Undecided", OPz_ScrnRecOthrs ==
  4 ~ "4) Agree", OPz_ScrnRecOthrs == 5 ~ "5) Strongly Agree")) %>%
mutate(GNz_WRole = case_when(GNz_WRole == 1 ~ "1) Strongly Disagree",
  GNz_WRole == 2 ~ "2) Disagree", GNz_WRole == 3 ~ "3) Undecided",
  GNz_WRole == 4 ~ "4) Agree", GNz_WRole == 5 ~ "5) Strongly Agree")) %>%
mutate(GNz_ManDecis = case_when(GNz_ManDecis == 1 ~ "1) Strongly Disagree",
  GNz_ManDecis == 2 ~ "2) Disagree", GNz_ManDecis == 3 ~

```

```

    "3) Undecided", GNz_ManDecis == 4 ~ "4) Agree", GNz_ManDecis ==
    5 ~ "5) Strongly Agree"))

TA_SocNorms_Scrnd <- tableby(BEZ_Screend ~ fe(OPz_ScrnWRec, "countpct") +
  fe(OPz_ScrnRecOthrs, "countpct") + fe(GNz_WRole, "countpct") +
  fe(GNz_ManDecis, "countpct") + fe(STz_CAComfNear, "countpct") +
  fe(STz_CAAbnl, "countpct") + fe(STz_CANeedsPriority, "countpct") +
  fe(STz_CAPtFault, "countpct") + fe(STz_CAFeelPity, "countpct") +
  fe(STz_CADxFear, "countpct") + fe(OPz_CAWorry, "countpct") +
  fe(ATz_BnfComf, "countpct") + fe(ATz_MyDxSlfKno, "countpct") +
  fe(ATz_MyDxFamKno, "countpct") + fe(ATz_FamDxMyKno, "countpct") +
  fe(ATz_DxFate, "countpct") + fe(DSz_HCSN, "countpct") + fe(DSz_RespGen,
  "countpct") + fe(DSz_RespPrtn, "countpct") + fe(DSz_Smrt,
  "countpct") + fe(DSz_Hnst, "countpct") + fe(DSz_Thret, "countpct") +
  fe(GNz_WHCDecisAll_01, "countpct") + fe(GNz_WHCDecisAll_02,
  "countpct") + fe(OPz_InfluenceWho_06, "countpct") + fe(OPz_InfluenceWho_04,
  "countpct") + fe(OPz_InfluenceWho_02, "countpct") + fe(OPz_InfluenceWho_09,
  "countpct") + fe(OPz_InfluenceWho_01, "countpct") + fe(HSz_DecTrust_02,
  "countpct") + fe(HSz_DecTrust_07, "countpct") + fe(HSz_DecTrust_04,
  "countpct") + fe(HSz_DecTrust_06, "countpct") + fe(HSz_DecTrust_08,
  "countpct") + fe(HSz_DecTrust_03, "countpct") + fe(HSz_DecTrust_01,
  "countpct"), simulate.p.value = TRUE, data = SocNorms_Scrnd)

labels(TA_SocNorms_Scrnd) <- c(STz_CAAbnl = "Once youve had cancer youre never normal again.",
  STz_CAComfNear = "I would not feel comfortable around someone with cancer.",
  STz_CANeedsPriority = "The health care needs of people with cancer should not be prioritized.",
  STz_CAPtFault = "If a person has cancer its probably their fault.",
  STz_CAFeelPity = " I would feel sorry for someone with cancer.",
  STz_CADxFear = "I feel that cancer is more frightening than most other diseases.",
  OPz_CAWorry = "Other women often state that they are worried about getting cancer.",
  ATz_BnfComf = "Cancer testing or treatment that is unpleasant is worth getting if it would help me to live longer",
  ATz_MyDxSlfKno = "If I had cancer, I would want to know that I have it",
  ATz_MyDxFamKno = "If I had cancer, I would want my family to know that I have it.",
  ATz_FamDxMyKno = "If someone else in my family had cancer, I would want to know that they have it.",
  ATz_DxFate = "Getting a serious disease like cancer is fate, there is nothing I can do to change fate",
  DSz_RespGen = "Feel treated with less courtesy or respect than others",
  DSz_RespPrtn = "Feel treated with less courtesy or respect by their spouse",
  DSz_Smrt = "Feel that others act as if they are not smart",

```













```
## 1. Fisher's Exact Test for Count Data with simulated p-value
## (based on 2000 replicates)
## 2. Fisher's Exact Test for Count Data
```

```
# write2pdf(TA_SocNorms_Scrnd,
# here('Tables', 'Sup_01_SocNorms_Scrnd.pdf'))
# write2word(TA_SocNorms_Scrnd,
# here('Tables', 'Sup_01_SocNorms_Scrnd.doc'))
# write2html(TA_SocNorms_Scrnd,
# here('Tables', 'Sup_01_SocNorms_Scrnd.html'))
```

```
#Supplement 2. Perception of gender roles by gender with effect modification by education
```

```
Power_Gendr_Ed <- Q1804dta_MSJoin %>% select(SDz_Gender, SDz_Educatn,
  OPz_ScrnWRec, OPz_ScrnRecOthrs, GNz_WRole, GNz_ManDecis,
  OPz_InfluenceWho_01, OPz_InfluenceWho_04, OPz_InfluenceWho_02,
  OPz_InfluenceWho_06, OPz_InfluenceWho_09, HSz_DecTrust_02,
  HSz_DecTrust_07, HSz_DecTrust_04, HSz_DecTrust_06, HSz_DecTrust_08,
  HSz_DecTrust_03, HSz_DecTrust_01, GNz_WHCDecisAll_01, GNz_WHCDecisAll_02) %>%
mutate(SDz_Gender = case_when(SDz_Gender == 0 ~ "0) Female",
  SDz_Gender == 1 ~ "1) Male")) %>% mutate(OPz_ScrnWRec = case_when(OPz_ScrnWRec ==
1 ~ "1) Strongly Disagree", OPz_ScrnWRec == 2 ~ "2) Disagree",
OPz_ScrnWRec == 3 ~ "3) Undecided", OPz_ScrnWRec == 4 ~ "4) Agree",
OPz_ScrnWRec == 5 ~ "5) Strongly Agree")) %>% mutate(OPz_ScrnRecOthrs = case_when(OPz_ScrnRecOthrs ==
1 ~ "1) Strongly Disagree", OPz_ScrnRecOthrs == 2 ~ "2) Disagree",
OPz_ScrnRecOthrs == 3 ~ "3) Undecided", OPz_ScrnRecOthrs ==
4 ~ "4) Agree", OPz_ScrnRecOthrs == 5 ~ "5) Strongly Agree")) %>%
mutate(GNz_WRole = case_when(GNz_WRole == 1 ~ "1) Strongly Disagree",
  GNz_WRole == 2 ~ "2) Disagree", GNz_WRole == 3 ~ "3) Undecided",
  GNz_WRole == 4 ~ "4) Agree", GNz_WRole == 5 ~ "5) Strongly Agree")) %>%
mutate(GNz_ManDecis = case_when(GNz_ManDecis == 1 ~ "1) Strongly Disagree",
  GNz_ManDecis == 2 ~ "2) Disagree", GNz_ManDecis == 3 ~
  "3) Undecided", GNz_ManDecis == 4 ~ "4) Agree", GNz_ManDecis ==
  5 ~ "5) Strongly Agree")) %>% mutate(SDz_Educatn = case_when(SDz_Educatn ==
0 ~ "0 Low Educ", SDz_Educatn == 1 ~ "0 Low Educ", SDz_Educatn ==
2 ~ "1 Higher Educ", SDz_Educatn == 3 ~ "1 Higher Educ",
SDz_Educatn == 4 ~ "1 Higher Educ", SDz_Educatn == 5 ~ "1 Higher Educ",
SDz_Educatn == 99 ~ "Do Not Know / Not Sure"))
```

```
TA_Power_Gendr_Ed <- tableby(interaction(SDz_Gender, SDz_Educate) ~
  fe(GNz_WRole, "countpct") + fe(GNz_ManDecis, "countpct"),
  simulate.p.value = TRUE, data = Power_Gendr_Ed)

labels(TA_Power_Gendr_Ed) <- c(GNz_WRole = "A womans most important role is to take care of her home and cook for her family",
  GNz_ManDecis = "A man should have the final word about decisions in his home")

summary(TA_Power_Gendr_Ed, title = "Arsenal Table 18Q04", pfootnote = TRUE)
```

```
##
```

```
## Table: Arsenal Table 18Q04
```

```
##
```

```
## | | 0) Female.0 Low Educ (N=61) | 1) Male.0 Low Educ (N=61) |
## |-----|-----|-----|
## |**A womans most important role is to take care of her home and cook for her family**|
## |&nbsp;&nbsp;&nbsp;1) Strongly Disagree | 4 (6.7%) | 1 (3.8%)
## |&nbsp;&nbsp;&nbsp;2) Disagree | 7 (11.7%) | 1 (3.8%)
## |&nbsp;&nbsp;&nbsp;3) Undecided | 2 (3.3%) | 2 (7.7%)
## |&nbsp;&nbsp;&nbsp;4) Agree | 6 (10.0%) | 14 (53.8%)
## |&nbsp;&nbsp;&nbsp;5) Strongly Agree | 41 (68.3%) | 8 (30.8%)
## |**A man should have the final word about decisions in his home**|
## |&nbsp;&nbsp;&nbsp;1) Strongly Disagree | 7 (11.5%) | 1 (3.8%)
## |&nbsp;&nbsp;&nbsp;2) Disagree | 9 (14.8%) | 0 (0.0%)
## |&nbsp;&nbsp;&nbsp;3) Undecided | 1 (1.6%) | 0 (0.0%)
## |&nbsp;&nbsp;&nbsp;4) Agree | 9 (14.8%) | 11 (42.3%)
## |&nbsp;&nbsp;&nbsp;5) Strongly Agree | 35 (57.4%) | 14 (53.8%)
## 1. Fisher's Exact Test for Count Data with simulated p-value
## (based on 2000 replicates)
```

```
# write2pdf(TA_Power_Gendr_Ed,
# here('Tables', 'S02_Power_Gendr_Ed.pdf'))
# write2word(TA_Power_Gendr_Ed,
# here('Tables', 'S02_Power_Gendr_Ed.doc'))
# write2html(TA_Power_Gendr_Ed,
# here('Tables', 'S02_Power_Gendr_Ed.html'))
```

```
#Supplement 3. Adapted everyday discrimination scale by gender with effect modification by education.
```

```

Discr_Gendr_Ed <- Q1804dta_MSJoin %>% select(SDz_Gender, SDz_Educatn,
  DSz_RespGen, DSz_RespPrtn, DSz_Smrt, DSz_Hnst, DSz_Thret) %>%
mutate(SDz_Gender = case_when(SDz_Gender == 0 ~ "0) Female",
  SDz_Gender == 1 ~ "1) Male")) %>% mutate(DSz_RespGen = case_when(DSz_RespGen ==
1 ~ "1) Every day", DSz_RespGen == 2 ~ "2) Every week", DSz_RespGen ==
3 ~ "3) A few times per year", DSz_RespGen == 4 ~ "4) A few times in my life",
DSz_RespGen == 5 ~ "5) Never", DSz_RespGen == 99 ~ "Do Not Know / Not Sure")) %>%
mutate(DSz_RespPrtn = case_when(DSz_RespPrtn == 1 ~ "1) Every day",
  DSz_RespPrtn == 2 ~ "2) Every week", DSz_RespPrtn ==
3 ~ "3) A few times per year", DSz_RespPrtn == 4 ~
"4) A few times in my life", DSz_RespPrtn == 5 ~
"5) Never", DSz_RespPrtn == 99 ~ "Do Not Know / Not Sure")) %>%
mutate(DSz_Smrt = case_when(DSz_Smrt == 1 ~ "1) Every day",
  DSz_Smrt == 2 ~ "2) Every week", DSz_Smrt == 3 ~ "3) A few times per year",
  DSz_Smrt == 4 ~ "4) A few times in my life", DSz_Smrt ==
5 ~ "5) Never", DSz_Smrt == 99 ~ "Do Not Know / Not Sure")) %>%
mutate(DSz_Hnst = case_when(DSz_Hnst == 1 ~ "1) Every day",
  DSz_Hnst == 2 ~ "2) Every week", DSz_Hnst == 3 ~ "3) A few times per year",
  DSz_Hnst == 4 ~ "4) A few times in my life", DSz_Hnst ==
5 ~ "5) Never", DSz_Hnst == 99 ~ "Do Not Know / Not Sure")) %>%
mutate(DSz_Thret = case_when(DSz_Thret == 1 ~ "1) Every day",
  DSz_Thret == 2 ~ "2) Every week", DSz_Thret == 3 ~ "3) A few times per year",
  DSz_Thret == 4 ~ "4) A few times in my life", DSz_Thret ==
5 ~ "5) Never", DSz_Thret == 99 ~ "Do Not Know / Not Sure")) %>%
mutate(SDz_Educatn = case_when(SDz_Educatn == 0 ~ "0 Low Educ",
  SDz_Educatn == 1 ~ "0 Low Educ", SDz_Educatn == 2 ~ "1 Higher Educ",
  SDz_Educatn == 3 ~ "1 Higher Educ", SDz_Educatn == 4 ~
"1 Higher Educ", SDz_Educatn == 5 ~ "1 Higher Educ",
  SDz_Educatn == 99 ~ "Do Not Know / Not Sure"))

TA_Discr_Gendr_Ed <- tableby(interaction(SDz_Gender, SDz_Educatn) ~
  fe(DSz_RespGen, "countpct") + fe(DSz_RespPrtn, "countpct") +
  fe(DSz_Smrt, "countpct") + fe(DSz_Hnst, "countpct") +
  fe(DSz_Thret, "countpct"), simulate.p.value = TRUE, data = Discr_Gendr_Ed)

labels(TA_Discr_Gendr_Ed) <- c(DSz_RespGen = "Feel treated with less courtesy or respect than others",
  DSz_RespPrtn = "Feel treated with less courtesy or respect by their spouse",
  DSz_Smrt = "Feel that others act as if they are not smart",

```



```

# write2pdf(TA_Discr_Gendr_Ed,
# here('Tables', 'S03_Discr_Gendr_Ed.pdf'))
# write2word(TA_Discr_Gendr_Ed,
# here('Tables', 'S03_Discr_Gendr_Ed.doc'))
# write2html(TA_Discr_Gendr_Ed,
# here('Tables', 'S03_Discr_Gendr_Ed.html'))

```

#Supplement 4. Adapted cancer stigma scale by gender with effect modification by education.

```

Stigma_Gendr_Ed <- Q1804dta_MSJoin %>% select(SDz_Gender, SDz_Educatn,
  STz_CAAbnl, STz_CAComfNear, STz_CANeedsPriority, STz_CAPtFault,
  STz_CAFeelPity, STz_CADxFear, OPz_CAWorry) %>% mutate(SDz_Gender = case_when(SDz_Gender ==
  0 ~ "0) Female", SDz_Gender == 1 ~ "1) Male")) %>% mutate(STz_CAAbnl = case_when(STz_CAAbnl ==
  1 ~ "1) Strongly Disagree", STz_CAAbnl == 2 ~ "2) Disagree",
  STz_CAAbnl == 3 ~ "3) Undecided", STz_CAAbnl == 4 ~ "4) Agree",
  STz_CAAbnl == 5 ~ "5) Strongly Agree")) %>% mutate(STz_CAComfNear = case_when(STz_CAComfNear ==
  1 ~ "1) Strongly Disagree", STz_CAComfNear == 2 ~ "2) Disagree",
  STz_CAComfNear == 3 ~ "3) Undecided", STz_CAComfNear == 4 ~
  "4) Agree", STz_CAComfNear == 5 ~ "5) Strongly Agree")) %>%
  mutate(STz_CANeedsPriority = case_when(STz_CANeedsPriority ==
  1 ~ "1) Strongly Disagree", STz_CANeedsPriority == 2 ~
  "2) Disagree", STz_CANeedsPriority == 3 ~ "3) Undecided",
  STz_CANeedsPriority == 4 ~ "4) Agree", STz_CANeedsPriority ==
  5 ~ "5) Strongly Agree")) %>% mutate(STz_CAPtFault = case_when(STz_CAPtFault ==
  1 ~ "1) Strongly Disagree", STz_CAPtFault == 2 ~ "2) Disagree",
  STz_CAPtFault == 3 ~ "3) Undecided", STz_CAPtFault == 4 ~
  "4) Agree", STz_CAPtFault == 5 ~ "5) Strongly Agree")) %>%
  mutate(STz_CAFeelPity = case_when(STz_CAFeelPity == 1 ~ "1) Strongly Disagree",
  STz_CAFeelPity == 2 ~ "2) Disagree", STz_CAFeelPity ==
  3 ~ "3) Undecided", STz_CAFeelPity == 4 ~ "4) Agree",
  STz_CAFeelPity == 5 ~ "5) Strongly Agree")) %>% mutate(STz_CADxFear = case_when(STz_CADxFear ==
  1 ~ "1) Strongly Disagree", STz_CADxFear == 2 ~ "2) Disagree",
  STz_CADxFear == 3 ~ "3) Undecided", STz_CADxFear == 4 ~ "4) Agree",
  STz_CADxFear == 5 ~ "5) Strongly Agree")) %>% mutate(OPz_CAWorry = case_when(OPz_CAWorry ==
  1 ~ "1) Strongly Disagree", OPz_CAWorry == 2 ~ "2) Disagree",
  OPz_CAWorry == 3 ~ "3) Undecided", OPz_CAWorry == 4 ~ "4) Agree",
  OPz_CAWorry == 5 ~ "5) Strongly Agree")) %>% mutate(SDz_Educatn = case_when(SDz_Educatn ==
  0 ~ "0 Low Educ", SDz_Educatn == 1 ~ "0 Low Educ", SDz_Educatn ==

```







#Supplement 5. Cancer Attitudes by gender with effect modification by education.

```
Attd_Gendr_Ed <- Q1804dta_MSJoin %>% select(SDz_Gender, SDz_Educatn,
  BEz_Screend, ATz_BnfComf, ATz_MyDxSlfKno, ATz_MyDxFamKno,
  ATz_FamDxMyKno, ATz_DxFate) %>% mutate(SDz_Gender = case_when(SDz_Gender ==
  0 ~ "0) Female", SDz_Gender == 1 ~ "1) Male")) %>% mutate(ATz_BnfComf = case_when(ATz_BnfComf ==
  1 ~ "1) Strongly Disagree", ATz_BnfComf == 2 ~ "2) Disagree",
  ATz_BnfComf == 3 ~ "3) Undecided", ATz_BnfComf == 4 ~ "4) Agree",
  ATz_BnfComf == 5 ~ "5) Strongly Agree")) %>% mutate(ATz_MyDxSlfKno = case_when(ATz_MyDxSlfKno ==
  1 ~ "1) Strongly Disagree", ATz_MyDxSlfKno == 2 ~ "2) Disagree",
  ATz_MyDxSlfKno == 3 ~ "3) Undecided", ATz_MyDxSlfKno == 4 ~
  "4) Agree", ATz_MyDxSlfKno == 5 ~ "5) Strongly Agree")) %>%
  mutate(ATz_MyDxFamKno = case_when(ATz_MyDxFamKno == 1 ~ "1) Strongly Disagree",
  ATz_MyDxFamKno == 2 ~ "2) Disagree", ATz_MyDxFamKno ==
  3 ~ "3) Undecided", ATz_MyDxFamKno == 4 ~ "4) Agree",
  ATz_MyDxFamKno == 5 ~ "5) Strongly Agree")) %>% mutate(ATz_FamDxMyKno = case_when(ATz_FamDxMyKno ==
  1 ~ "1) Strongly Disagree", ATz_FamDxMyKno == 2 ~ "2) Disagree",
  ATz_FamDxMyKno == 3 ~ "3) Undecided", ATz_FamDxMyKno == 4 ~
  "4) Agree", ATz_FamDxMyKno == 5 ~ "5) Strongly Agree")) %>%
  mutate(ATz_DxFate = case_when(ATz_DxFate == 1 ~ "1) Strongly Disagree",
  ATz_DxFate == 2 ~ "2) Disagree", ATz_DxFate == 3 ~ "3) Undecided",
  ATz_DxFate == 4 ~ "4) Agree", ATz_DxFate == 5 ~ "5) Strongly Agree")) %>%
  mutate(SDz_Educatn = case_when(SDz_Educatn == 0 ~ "0 Low Educ",
  SDz_Educatn == 1 ~ "0 Low Educ", SDz_Educatn == 2 ~ "1 Higher Educ",
  SDz_Educatn == 3 ~ "1 Higher Educ", SDz_Educatn == 4 ~
  "1 Higher Educ", SDz_Educatn == 5 ~ "1 Higher Educ",
  SDz_Educatn == 99 ~ "Do Not Know / Not Sure"))

TA_Attd_Gendr_Ed <- tableby(interaction(SDz_Gender, SDz_Educatn) ~
  fe(ATz_BnfComf, "countpct") + fe(ATz_MyDxSlfKno, "countpct") +
  fe(ATz_MyDxFamKno, "countpct") + fe(ATz_FamDxMyKno, "countpct") +
  fe(ATz_DxFate, "countpct"), simulate.p.value = TRUE,
  data = Attd_Gendr_Ed)

labels(TA_Attd_Gendr_Ed) <- c(ATz_BnfComf = "Cancer testing or treatment that is unpleasant is worth getting if it would help me to live l
  ATz_MyDxSlfKno = "If I had cancer, I would want to know that I have it",
  ATz_MyDxFamKno = "If I had cancer, I would want my family to know that I have it.",
  ATz_FamDxMyKno = "If someone else in my family had cancer, I would want to know that they have it.",
  ATz_DxFate = "Getting a serious disease like cancer is fate, there is nothing I can do to change fate")
```



```

# write2pdf(TA_Attd_Gendr_Ed,
# here('Tables', 'S05_Attd_Gendr_Ed.pdf'))
# write2word(TA_Attd_Gendr_Ed,
# here('Tables', 'S05_Attd_Gendr_Ed.doc'))
# write2html(TA_Attd_Gendr_Ed,
# here('Tables', 'S05_Attd_Gendr_Ed.html'))

```

#Supplement 6. Cervical cancer screening recommendation by gender with effect modification by education.

```

ScrnRec_Gendr_Ed <- Q1804dta_MSJoin %>% select(SDz_Gender, SDz_Educatn,
  OPz_ScrnWRec, OPz_ScrnRecOthrs, GNz_WRole, GNz_ManDecis,
  OPz_InfluenceWho_01, OPz_InfluenceWho_04, OPz_InfluenceWho_02,
  OPz_InfluenceWho_06, OPz_InfluenceWho_09, HSz_DecTrust_02,
  HSz_DecTrust_07, HSz_DecTrust_04, HSz_DecTrust_06, HSz_DecTrust_08,
  HSz_DecTrust_03, HSz_DecTrust_01, GNz_WHCDecisAll_01, GNz_WHCDecisAll_02) %>%
mutate(SDz_Gender = case_when(SDz_Gender == 0 ~ "0) Female",
  SDz_Gender == 1 ~ "1) Male")) %>% mutate(OPz_ScrnWRec = case_when(OPz_ScrnWRec ==
1 ~ "1) Strongly Disagree", OPz_ScrnWRec == 2 ~ "2) Disagree",
OPz_ScrnWRec == 3 ~ "3) Undecided", OPz_ScrnWRec == 4 ~ "4) Agree",
OPz_ScrnWRec == 5 ~ "5) Strongly Agree")) %>% mutate(OPz_ScrnRecOthrs = case_when(OPz_ScrnRecOthrs ==
1 ~ "1) Strongly Disagree", OPz_ScrnRecOthrs == 2 ~ "2) Disagree",
OPz_ScrnRecOthrs == 3 ~ "3) Undecided", OPz_ScrnRecOthrs ==
4 ~ "4) Agree", OPz_ScrnRecOthrs == 5 ~ "5) Strongly Agree")) %>%
mutate(GNz_WRole = case_when(GNz_WRole == 1 ~ "1) Strongly Disagree",
  GNz_WRole == 2 ~ "2) Disagree", GNz_WRole == 3 ~ "3) Undecided",
  GNz_WRole == 4 ~ "4) Agree", GNz_WRole == 5 ~ "5) Strongly Agree")) %>%
mutate(GNz_ManDecis = case_when(GNz_ManDecis == 1 ~ "1) Strongly Disagree",
  GNz_ManDecis == 2 ~ "2) Disagree", GNz_ManDecis == 3 ~
  "3) Undecided", GNz_ManDecis == 4 ~ "4) Agree", GNz_ManDecis ==
  5 ~ "5) Strongly Agree")) %>% mutate(SDz_Educatn = case_when(SDz_Educatn ==
0 ~ "0 Low Educ", SDz_Educatn == 1 ~ "0 Low Educ", SDz_Educatn ==
2 ~ "1 Higher Educ", SDz_Educatn == 3 ~ "1 Higher Educ",
SDz_Educatn == 4 ~ "1 Higher Educ", SDz_Educatn == 5 ~ "1 Higher Educ",
SDz_Educatn == 99 ~ "Do Not Know / Not Sure"))

TA_ScrnRec_Gendr_Ed <- tableby(interaction(SDz_Gender, SDz_Educatn) ~
  fe(OPz_ScrnWRec, "countpct") + fe(OPz_ScrnRecOthrs, "countpct"),
  simulate.p.value = TRUE, data = ScrnRec_Gendr_Ed)

```
